# Supplementary material
Source: HighWire-hosted journal article supplement (https://bmjopen.bmj.com/content/14/4/e081056)
Supplement: inline-supplementary-material-4 [file inline-supplementary-material-4.pdf]

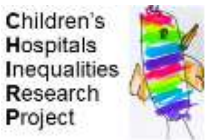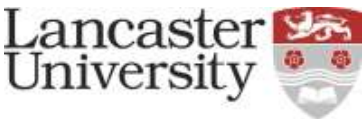

**Study: Children’s Hospitals Inequalities Research Project (CHIRP).**

|                                                          |                                          |
|----------------------------------------------------------|------------------------------------------|
| Researcher name                                          |                                          |
| Study location (name of hospital)                        |                                          |
| Interview/ focus group (delete as applicable)            | If focus group: number of participants = |
| Participant group (leadership, clinician, other)         |                                          |
| Examples of socio-economic inequalities                  |                                          |
| Deprivation: impact on children’s health                 |                                          |
| Deprivation: impact on access to care                    |                                          |
| Deprivation: visibility in their context (hospital)      |                                          |
| Perceived/ outlined role in health inequalities          |                                          |
| Awareness of policies/ policies and organisational views |                                          |
| Processes in place for support                           |                                          |

|                                                  |  |
|--------------------------------------------------|--|
| Impact of Covid                                  |  |
| What the Trust currently does                    |  |
| What the Trust might do more of/ better          |  |
| What stops the Trust doing more/ better          |  |
| Examples of best practice                        |  |
| Clarification points (policies; <u>SL only</u> ) |  |
| Miscellaneous                                    |  |
| Other comments                                   |  |
